# Supplementary material for: Polymerase Θ is a key driver of genome evolution and of CRISPR/Cas9-mediated mutagenesis
Source: PubMed Central journal article supplement (PMC4490562; doi:10.1038/ncomms8394), 2015-06-16
Supplement: ncomms8394-s1.pdf [file ncomms8394-s1.pdf]

Supplementary Figure 1

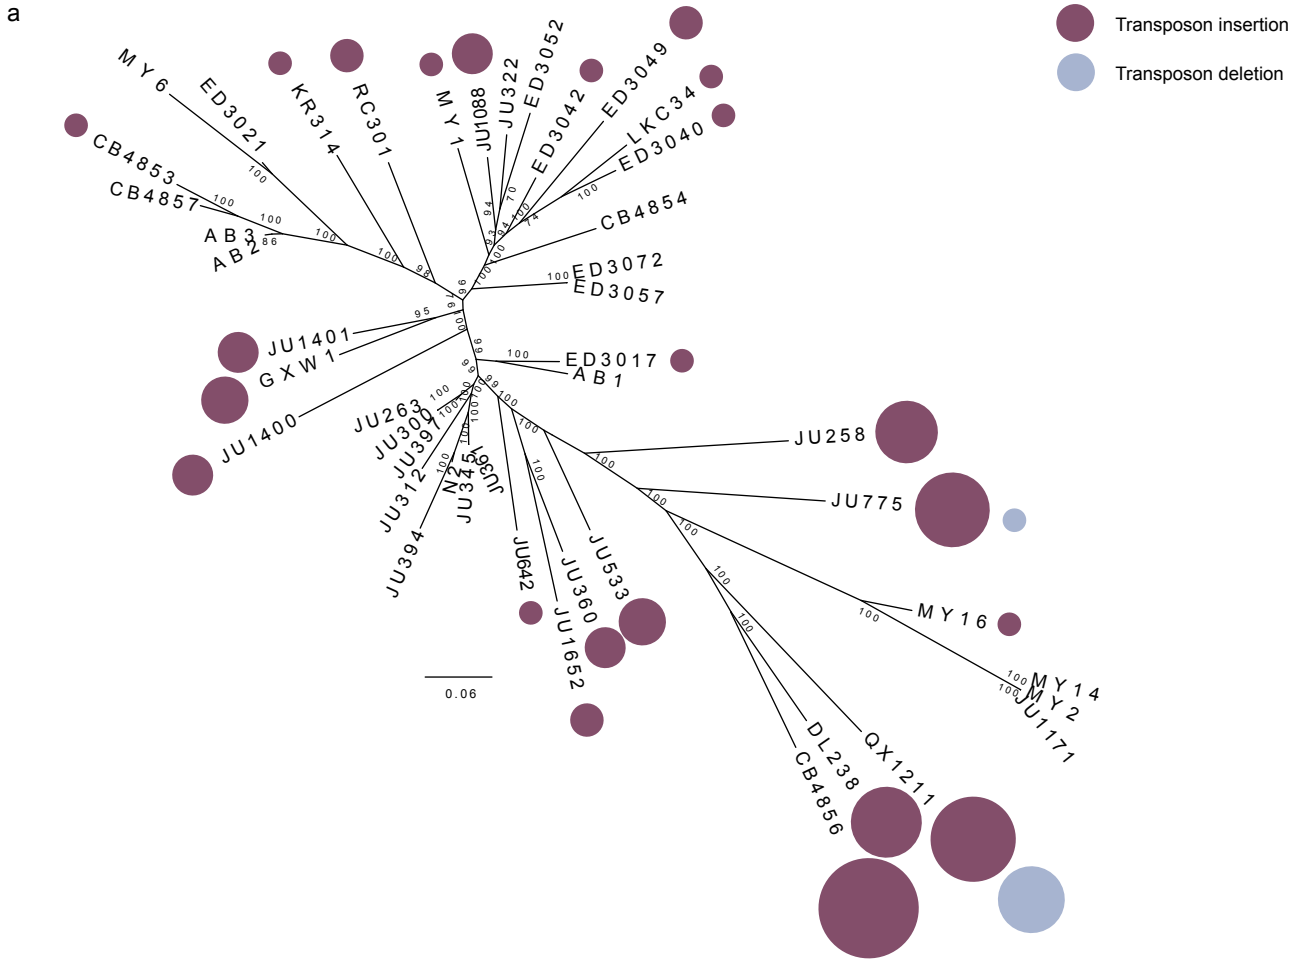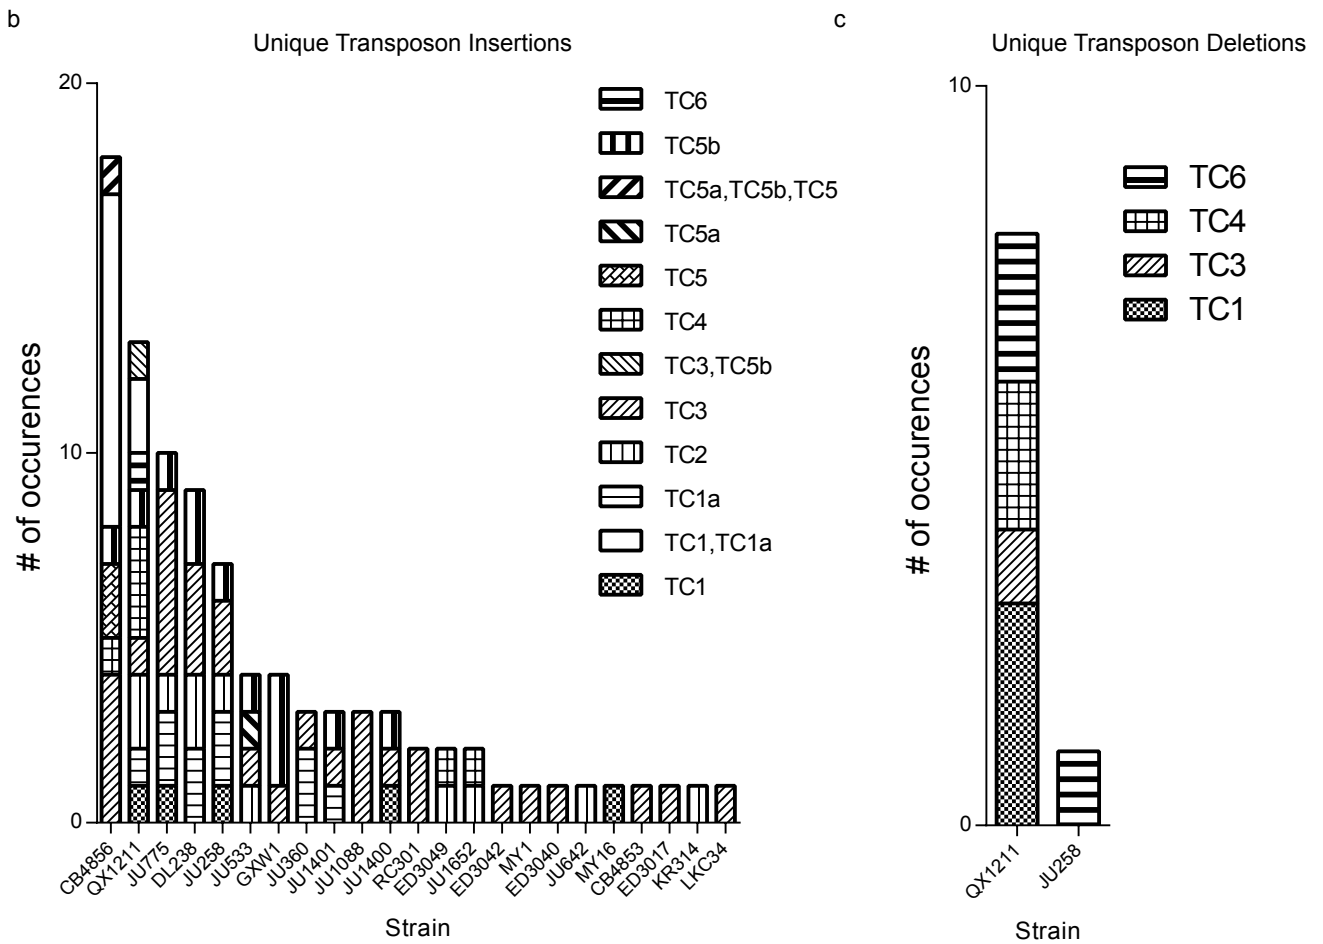

## Supplementary Figure 1

DNA transposition in natural isolates of *C. elegans*. A. A phylogenetic tree was constructed from ~22,000 informative SNPs (See Material & Method section for details) present in 45 natural isolates. The outcomes of standard bootstrap analysis (1000 times) are plotted for each branch point. Transposon insertions were identified by RetroSeq, which was specifically designed to find such events in paired-end sequence data. The surface area of the plotted circle reflects the number of insertions (purple) and potential deletions (blue) that are unique to each strain: because the tree is unrooted, it cannot be concluded from this analysis whether the events that are marked as deletions (blue) in QX1211, one of the most diverged strains, are not in fact de novo insertions in a parent-of-origin that spawned all isolates after a split with QX1211. B. The number of unique insertions per type of transposon in each strain is plotted. C. The number of copies per type of transposon that was uniquely absent in each strain is plotted.

# Supplementary Figure 2

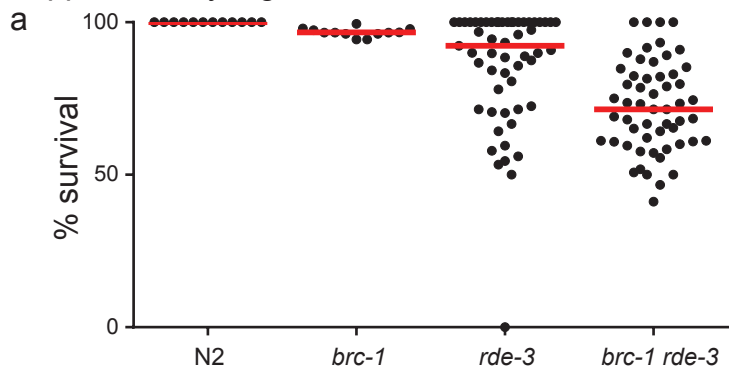

**b**

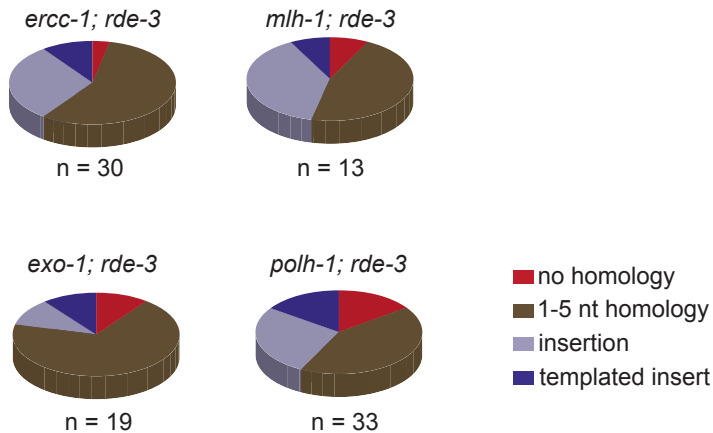

## Supplementary Figure 2

Genetic analysis of error-prone repair of transposon-induced breaks in *C. elegans* germ cells. **A.** Transposon breaks-induced embryonic death. Bee swarm plot in which embryo survival is plotted for strains in which transposition is silenced (N2) or de-repressed in germ cells (*rde-3*) and are either proficient or deficient for the homologous recombination gene *brc-1*. Each dot represents the offspring of one animal; the percentage is calculated as the number of hatched larvae divided by the number of total eggs laid. For both N2 and *brc-1*-deficient animals the survival of at least 10 P0 animals was scored, while for the *rde-3*-deficient strains at least 50 P0 animals was scored. The red line represents the median survival for each strain. **B.** Distribution of footprints in *unc-22(st192)* for the indicated genomic backgrounds. The number of independently derived reversion alleles is depicted underneath. Distinct footprints were classified into 4 separate categories: i) simple deletions without homology at the deletion junction (red), ii) simple deletions with 1-5 bp of sequence homology at the deletion junction (brown), iii) deletions that also contained insertions (light blue), and iv) deletions with associated insertions that were identical to sequences immediate flanking the break (blue).



### Supplementary Figure 3

Molecular model for TMEJ-generated templated inserts. **A.** Schematic illustration of the consecutive steps of TMEJ of a Tc1-induced DSB leading to the most commonly found templated inserts (12/103 for the outcome displayed on the left; 24/103 for the outcome displayed on the right). The sequence context of *unc-22(st192)* upon excision of Tc1 is displayed, with the 3'CA overhangs in blue. In the first round of the cycle the outermost 3' base (A) has served as a primer for POLQ action by base-pairing (boxed in yellow) to the first available T of the opposite flank; the left flank in the left panel and the right flank in the right panel. Newly synthesized DNA, through the action of POLQ, is displayed in red. Nucleotides that are either displaced by POLQ action or absent because of DSB processing prior to POLQ action are depicted in grey. The formation of the resulting intermediate, that is presumably energetically more stable because of the extended base-pairing of the newly synthesized DNA to its template, is apparently not always driving the process into the generation of simple deletions (without insertions, but with single nucleotide homology). Instead, for thus far unknown reasons, further extension is abrogated, and subsequently the outmost 3' base will search for a new match to re-anneal and again serve as a primer in a second attempt to join both ends. It is noteworthy that the most prominent templated inserts (left and right panel) are conceptually identical: in the first cycle DNA synthesis is continued up to the point where the two outermost 3' nucleotide of newly synthesized DNA can base-pair with the outermost 2 nucleotides of the template strand. **B.** Re-iteration of the steps displayed in A can explain even the most complex inserts. In the illustrated case, both flanks served as template for DNA synthesis; the left flank 3 times and the right flank 2 times, and all DNA synthesis events were primed with 1 nt base pairing.

# Supplementary Figure 4

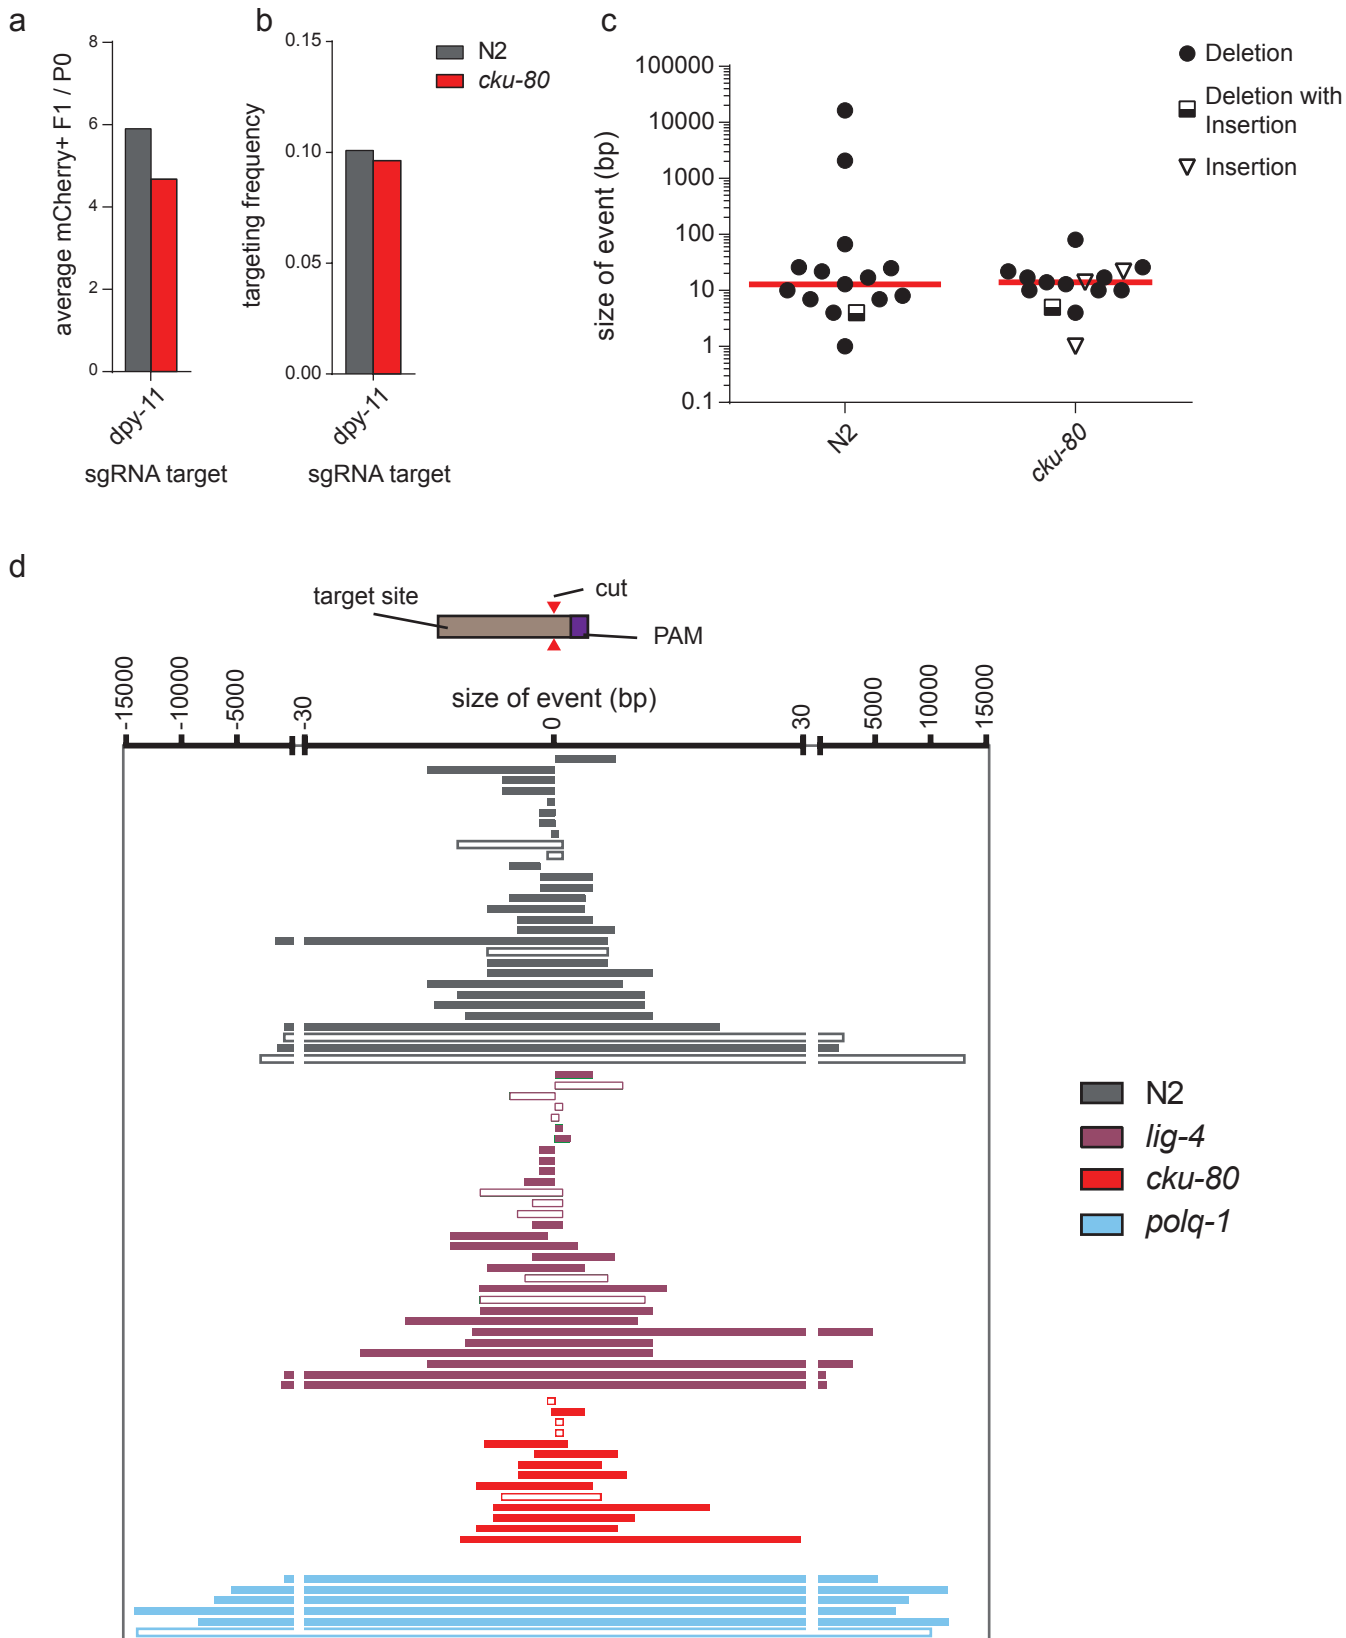

## Supplementary Figure 4

Genetic and molecular analysis of CRISPR/Cas9-induced genome rearrangements. **A-C.** Error-prone repair of CRISPR/Cas9-induced DSBs is independent of NHEJ protein CKU-80. **A.** A quantification of the efficiency of transgenesis in wild type (N2) and *cku-80*-deficient animals. The average number of mCherry-expressing animals per injected P0 animal is indicated. At least 20 animals were injected per strain. **B.** A quantification of the efficiency of CRISPR/Cas9-induced gene targeting of the *dpy-11* locus in wild type (N2) animals and *cku-80* deficient animals. The frequency is the number of mutant alleles divided by the number of successfully transformed F1 progeny animals. **C.** A size representation of CRISPR/Cas9-induced *dpy-11* mutants that were obtained in wild type and in *cku-80* mutant animals. The median is indicated in red. **D.** A visual representation of the CRISPR/Cas9-induced *dpy-11*, *unc-22* (target 1) and *unc-22* (target 2) alleles that were obtained in the strains of indicated genotype. 0 (bp) defines the cut-site of the sgRNA/Cas9 complex, and the orientation of the target and PAM site relative to 0 is depicted. Bars represent the DNA sequence that is lost in each allele. Closed bars represent simple deletions; open bars represent insertions, deletion with insertions and deletions with inversions.



# Supplementary Figure 5

a

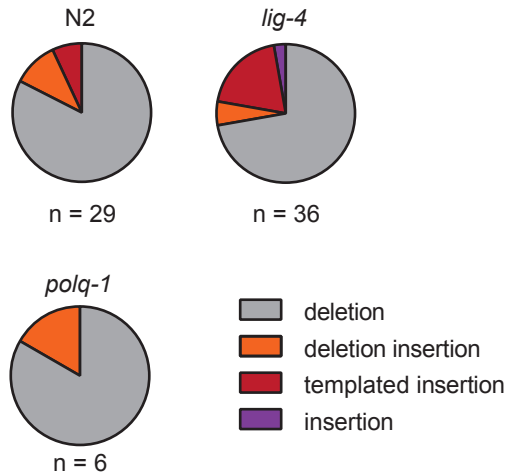

b

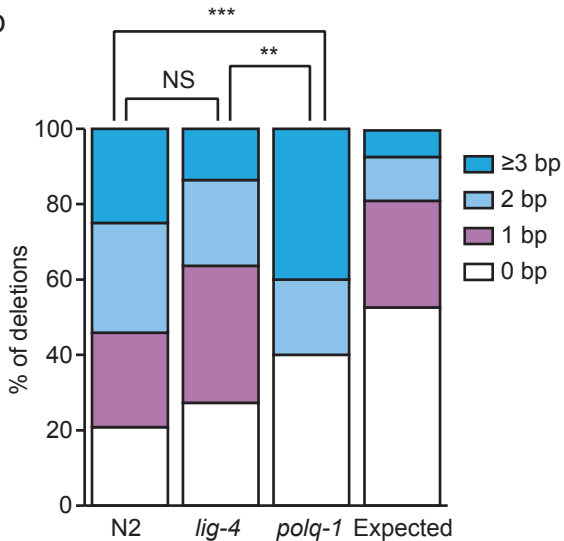

## Supplementary Figure 5

Types and homology distribution of CRISPR/Cas9 induced mutations. **A.** The distribution of mutational classes in strains of indicated genotype. **B.** Quantification of the extent of microhomology for the simple deletions obtained in strains of indicated genotype. The distribution that is expected if deletions were randomly distributed is also indicated. The distribution in wild type (N2) and *lig-4* mutant animals is statistically not significantly different (NS), however, both are different from *polq-1*. (\*\*  $p < 0.01$ , \*\*\*  $p < 0.001$ , T-test)

# Supplementary Figure 6

a

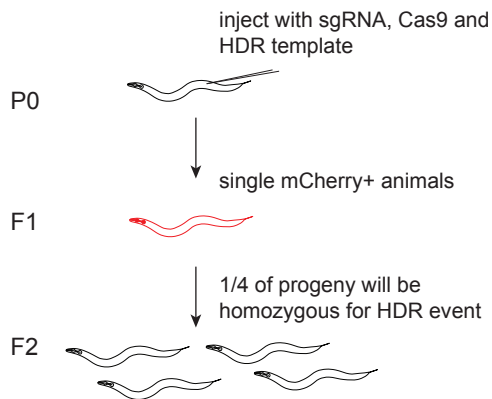

b

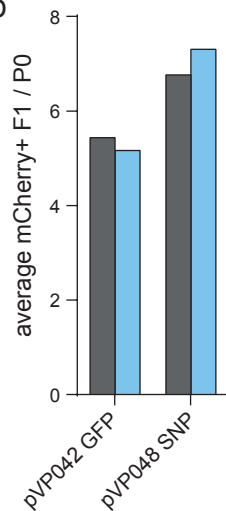

c

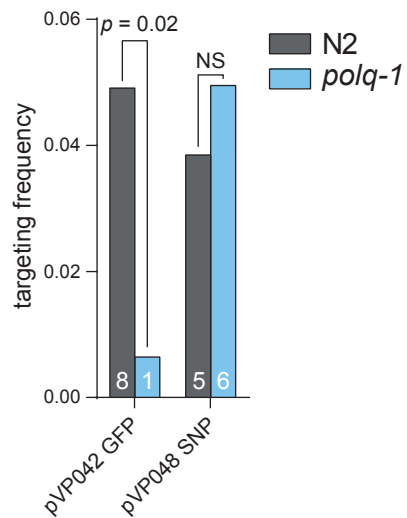

d

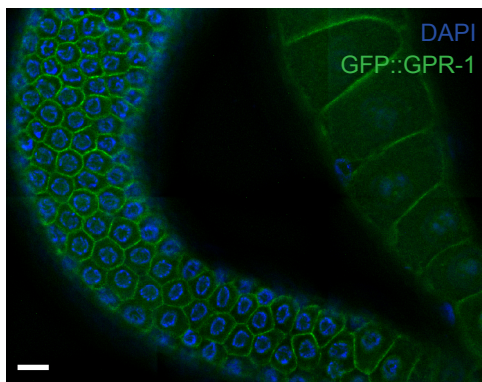

e

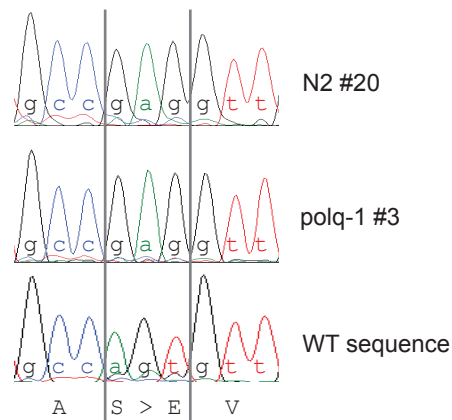

## Supplementary Figure 6

No increase in Homology Directed Repair (HDR) in animals defective for POLQ-1 **A.** A schematic illustration of the strategy to generate CRISPR/Cas9-induced alleles via HDR in *C. elegans*. Hermaphroditic animals (P0) are microinjected with a plasmid that provides germline expression of Cas9, a guide RNA that targets a gene of interest, and a plasmid that has a template for HDR. A marker plasmid that results in somatic mCherry expression is also co-injected. Only mCherry-positive progeny animals (F1) were clonally grown because these have, when compared to non-expressing progeny animals, a higher chance of carrying a (heterozygous) mutation in the targeted gene. Homozygous mutant animals will manifest in a Mendelian manner in the brood (F2) of transformed F1's because of hermaphroditism. **B.** A quantification of the efficiency of transgenesis in animals of different genotype. The average number of mCherry-expressing animals per injected P0 animal is indicated for each target locus. At least 20 animals were injected per target per strain. **C.** A quantification of the efficiency of CRISPR/Cas9-induced gene targeting in wild type and *polq-1* mutant animals for the indicated locus. The frequency is the number of mutant alleles divided by the number of successfully transformed F1 progeny animals. A Fisher's exact test was used to determine statistical significance. **D.** Representative image of successful HDR-mediated targeting of GFP to the endogenous *gpr-1* locus using CRISPR/Cas9. GPR-1::GFP (green) expression is visible in the cortex of germ cells in the distal (left) and proximal (right) area of the gonadal syncytium. DAPI staining in blue marks nuclei. Scale bar = 5  $\mu$ m. **E.** Sanger sequences of two SNP alleles that were generated via CRISPR/Cas9-induced HDR. The wild type and mutant DNA as well as the amino acid sequence is indicated.

# Supplementary Figure 7

a

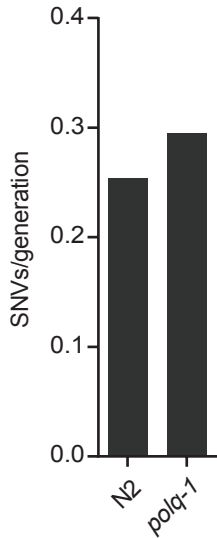

b

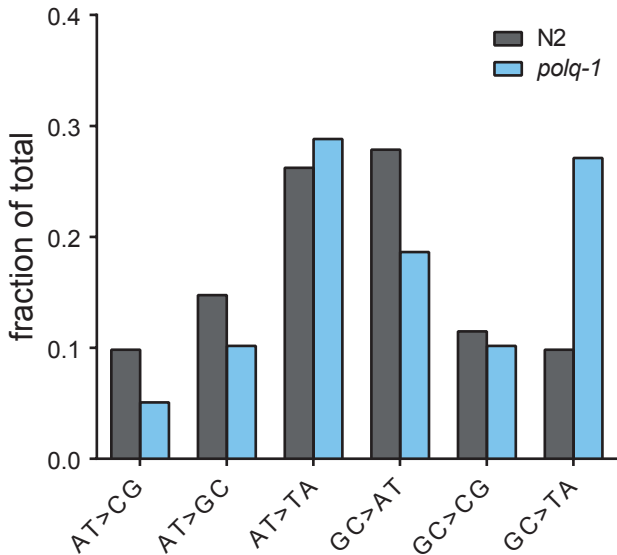

## Supplementary Figure 7

Comparable SNV induction rates and distributions in wild type (N2) and *polq-1* mutant animals. **A.**

Quantification of the SNV induction rate (SNVs per generation) for the indicated genetic background. The data were obtained from sequencing 4 times 60 generations of wild type growth and 4 times 50 generations of *polq-1* growth. **B.** The base composition of the SNVs that accumulated in wild type and *polq-1* mutant animals. Both distributions are comparable, apart from an elevated rate of GC>TA mutations in POLQ-1 deficient animals.

### Supplementary Table 1. CRISPR targets

| Target    | Sequence                        | Chromosome    | Start    | End      |
|-----------|---------------------------------|---------------|----------|----------|
| dpy-11    | GCAAGGATCTTCAAAAAGCA <b>TGG</b> | CHROMOSOME_V  | 6512819  | 6512842  |
| unc-22 #1 | GACTGCTTGCGGAGAGAGCA <b>AGG</b> | CHROMOSOME_IV | 11985320 | 11985343 |
| unc-22 #2 | GAAAAGCAAGATGCTGCCAC <b>TGG</b> | CHROMOSOME_IV | 11985349 | 11985372 |

**Supplementary Table 2. CRISPR injections**

| Strain | Allele          | Target        | Injected P0s | mCherry+F1 | Targeting succes |
|--------|-----------------|---------------|--------------|------------|------------------|
| N2     |                 | dpy-11        | 20           | 118        | 12               |
| RB873  | lig-4 (ok716)   | dpy-11        | 20           | 141        | 16               |
| XF152  | polq-1 (tm2026) | dpy-11        | 37           | 250        | 8                |
| N2     |                 | unc-22 #1     | 18           | 69         | 9                |
| RB873  | lig-4 (ok716)   | unc-22 #1     | 14           | 83         | 14               |
| XF152  | polq-1 (tm2026) | unc-22 #1     | 38           | 117        | 2                |
| N2     |                 | unc-22 #2     | 20           | 85         | 7                |
| RB873  | lig-4 (ok716)   | unc-22 #2     | 20           | 121        | 3                |
| XF152  | polq-1 (tm2026) | unc-22 #2     | 40           | 167        | 1                |
| N2     |                 | HDR #1<br>GFP | 30           | 163        | 8                |
| XF152  | polq-1 (tm2026) | HDR #1<br>GFP | 30           | 155        | 1                |
| N2     |                 | HDR #2<br>SNP | 23           | 168        | 6                |
| XF152  | polq-1 (tm2026) | HDR #2<br>SNP | 17           | 115        | 5                |
| RB964  | cku-80 (ok861)  | dpy-11        | 40           | 187        | 18               |



**Supplementary Table 3. Whole genome sequence information**

| Sample_ID | Allele          | #Generations | Average Coverage |
|-----------|-----------------|--------------|------------------|
| N2_2      | N2              | 60           | 28x              |
| N2_3      | N2              | 60           | 63x              |
| N2_4      | N2              | 60           | 16x              |
| N2_50     | N2              | 60           | 27x              |
| XF151_E50 | polq-1 (tm2026) | 50           | 31x              |
| XF151_G50 | polq-1 (tm2026) | 50           | 18x              |
| XF151_H50 | polq-1 (tm2026) | 50           | 38x              |
| XF151_I50 | polq-1 (tm2026) | 50           | 44x              |

**Supplementary Table 4. CNVs**

| SampleGroup | Sample    | Chr            | Size  | Start    | End      |
|-------------|-----------|----------------|-------|----------|----------|
| N2          | N2_3      | CHROMOSOME_III | 128   | 1407845  | 1407973  |
| N2          | N-4       | CHROMOSOME_I   | 18    | 4336437  | 4336455  |
| N2          | N-2       | CHROMOSOME_X   | 11    | 16256644 | 16256655 |
| N2          | N-4       | CHROMOSOME_I   | 8     | 7667695  | 7667695  |
| N2          | N-2       | CHROMOSOME_II  | 7     | 10938339 | 10938346 |
| N2          | N-2       | CHROMOSOME_V   | 6     | 18324033 | 18324039 |
| N2          | N2_50     | CHROMOSOME_V   | 2     | 12400541 | 12400543 |
| N2          | N2_3      | CHROMOSOME_II  | 2     | 13447058 | 13447060 |
| N2          | N-4       | CHROMOSOME_II  | 2     | 11519211 | 11519213 |
| N2          | N-2       | CHROMOSOME_I   | 1     | 4524154  | 4524155  |
| polq-1      | XF152_I50 | CHROMOSOME_IV  | 19397 | 8038373  | 8057770  |
| polq-1      | XF152_E50 | CHROMOSOME_V   | 15588 | 15466490 | 15482078 |
| polq-1      | XF152_E50 | CHROMOSOME_V   | 11424 | 3111176  | 3122600  |
| polq-1      | XF152_E50 | CHROMOSOME_II  | 1     | 1517738  | 1517738  |



|        |           |               |   |          |          |      |      |              |
|--------|-----------|---------------|---|----------|----------|------|------|--------------|
| polq-1 | XF152_I50 | CHROMOSOME_V  | 1 | 3449534  | 3449535  | DEL  | MONO | tTTTT        |
| polq-1 | XF152_I50 | CHROMOSOME_IV | 1 | 5199068  | 5199069  | DEL  | MONO | tTTTTTTT     |
| polq-1 | XF152_G50 | CHROMOSOME_X  | 1 | 6580098  | 6580099  | DEL  | MONO | aAAAAAAAA    |
| polq-1 | XF152_E50 | CHROMOSOME_V  | 1 | 8296059  | 8296060  | DEL  | MONO | aAAAAAAAA    |
| polq-1 | XF152_H50 | CHROMOSOME_IV | 1 | 8633324  | 8633325  | DEL  | MONO | tTTTTTTT     |
| polq-1 | XF152_E50 | CHROMOSOME_I  | 1 | 10093794 | 10093795 | DEL  | MONO | aAAAAAAAAA   |
| polq-1 | XF152_E50 | CHROMOSOME_IV | 1 | 13304597 | 13304598 | DEL  | MONO | aAAAAAA      |
| polq-1 | XF152_E50 | CHROMOSOME_X  | 1 | 16192386 | 16192387 | DEL  | MONO | aAAAAAAAAA   |
| polq-1 | XF152_H50 | CHROMOSOME_V  | 1 | 17052577 | 17052577 | SINS | MONO | aAAAAAAAAA   |
| polq-1 | XF152_I50 | CHROMOSOME_V  | 1 | 17711073 | 17711074 | DEL  | MONO | aAAAAAAAAA   |
| polq-1 | XF152_H50 | CHROMOSOME_V  | 1 | 18421950 | 18421950 | SINS | MONO | tTTTTTTTTTTT |
| polq-1 | XF152_E50 | CHROMOSOME_X  | 1 | 15785644 | 15785645 | DEL  | MONO | gGGGGGGGGG   |
